# Supplementary material for: Identification of an operon involved in fluoride resistance in Enterobacter cloacae FRM
Source: PubMed Central journal article supplement (PMC5533749; doi:10.1038/s41598-017-06988-1), 2017-07-28
Supplement: 41598_2017_6988_MOESM1_ESM.pdf [file 41598_2017_6988_MOESM1_ESM.pdf]

**Identification of an operon involved in fluoride resistance in *Enterobacter cloacae***

**FRM**

Xiaoqing Liu<sup>1,+</sup>, Jian Tian<sup>1,+</sup>, Lihui Liu<sup>1</sup>, Tao Zhu<sup>1</sup>, Xiaoxia Yu<sup>1</sup>, Xiaoyu Chu<sup>1</sup>, Bin Yao<sup>2,\*</sup>, Ningfeng Wu<sup>1,\*</sup>, and Yunliu Fan<sup>1</sup>

## Supplementary Information

**Table S1. Bacterial strains and plasmids used in this study.**

| Strains and plasmids        | Description                                                                                                                                 | Reference or Source |
|-----------------------------|---------------------------------------------------------------------------------------------------------------------------------------------|---------------------|
| Strains                     |                                                                                                                                             |                     |
| <i>E. coli</i> Top 10       | Clone strain                                                                                                                                | Our lab             |
| <i>Enterobacter cloacae</i> |                                                                                                                                             |                     |
| FRM                         | Wild type                                                                                                                                   | This study          |
| FRM- $\Delta$ <i>crcB</i>   | The <i>crcB</i> gene was deleted                                                                                                            | This study          |
| FRM- $\Delta$ <i>uspA</i>   | The <i>uspA</i> gene was deleted                                                                                                            | This study          |
| FRM- $\Delta$ CU            | Both the <i>crcB</i> and <i>uspA</i> gene were deleted                                                                                      | This study          |
| FRM- $\Delta$ Is3G          | The Is3G fragment containing <i>orf5249</i> , <i>crcB</i> , <i>gpmA</i> , <i>eno</i> , <i>uspA</i> and <i>ppaC</i> was deleted              | This study          |
| FRM- $\Delta$ Is3G-1        | The Is3G-1 Isfragment containing <i>orf5249</i> , <i>crcB</i> and <i>gpmA</i> was deleted                                                   | This study          |
| FRM- $\Delta$ Is3G-2        | The Is3G-2 fragment containing <i>eno</i> , <i>uspA</i> and <i>ppaC</i> was deleted                                                         | This study          |
| Plasmids                    |                                                                                                                                             |                     |
| pCas                        | <i>repA101</i> (Ts) <i>kan Pcas-cas9 ParaB-Red lacIq Ptrc-sgRNA-pMB1</i>                                                                    | (35)                |
| pTargetF                    |                                                                                                                                             | (35)                |
| pB1H1                       | The template for amplication of the <i>cat</i> gene                                                                                         | Our lab             |
| pTFcm                       | The <i>aadA</i> gene on pTargetF was replaced with the <i>cat</i> gene                                                                      | This study          |
| pTFcm- $\Delta$ <i>crcB</i> | sgRNA- <i>crcB</i> , 500-bp upstream and downstream of <i>crcB</i> were inserted into pTFcm                                                 | This study          |
| pTFcm- $\Delta$ <i>uspA</i> | sgRNA- <i>uspA</i> , 500-bp upstream and downstream of <i>uspA</i> were inserted into pTFcm                                                 | This study          |
| pTFcm- $\Delta$ Is3G        | sgRNA- <i>ppaC</i> , 1000-bp upstream of <i>ppaC</i> and 1000-bp downstream of <i>orf5249</i> were inserted into pTFcm                      | This study          |
| pTFcm- $\Delta$ Is3G-1      | sgRNA- <i>gpmA</i> , 1000-bp upstream of <i>gpmA</i> and 1000-bp downstream of <i>orf5249</i> were inserted into pTFcm                      | This study          |
| pTFcm- $\Delta$ Is3G-2      | sgRNA- <i>ppaC</i> , 1000-bp upstream of <i>ppaC</i> and 1000-bp downstream of <i>eno</i> were inserted into pTFcm                          | This study          |
| p3G                         | The Is3G fragment containing <i>orf5249</i> , <i>crcB</i> , <i>gpmA</i> , <i>eno</i> , <i>uspA</i> and <i>ppaC</i> were inserted into pTFcm | This study          |
| p3G1                        | The Is3G-1 Isfragment containing <i>orf5249</i> , <i>crcB</i> and <i>gpmA</i> were inserted into pTFcm                                      | This study          |
| p3G2                        | The Is3G-2 fragment containing <i>eno</i> , <i>uspA</i> and <i>ppaC</i> were inserted into pTFcm                                            | This study          |

**Table S2. Primers used in this study.**

| Primer                                                                          | Sequence (5'-3') <sup>a</sup>                               |
|---------------------------------------------------------------------------------|-------------------------------------------------------------|
| Verification of the elimination of the plasmid p1 and the three genomic islands |                                                             |
| p1-F                                                                            | TACGCTGGCCTTGGTGTCGTC                                       |
| p1-R                                                                            | GCGCTTGGATTTCCCTATGTC                                       |
| Is1-F                                                                           | CCAGCAGAACCAGTTAATTG                                        |
| Is1-R                                                                           | TGCGTACCACCTACTATAAG                                        |
| Is2-F                                                                           | CGCCGTATCAGTACCCATTG                                        |
| Is2-R                                                                           | ACGCCAGTAACGATTGTTAG                                        |
| Is3-F                                                                           | TGATTGATGAATTCGAAAGA                                        |
| Is3-R                                                                           | GGGCATCTCAGTGCTGACTA                                        |
| pCC1 sequencing primers                                                         |                                                             |
| pCC1-F                                                                          | GGATGTGCTGCAAGGCGATTAAGTTGG                                 |
| pCC1-R                                                                          | CTCGTATGTTGTGTGGAATTGTGAGC                                  |
| RT-PCR and qRT-PCR                                                              |                                                             |
| 5249-RT                                                                         | GCGACTATCTGTGACCTCCGAATGA                                   |
| <i>eno</i> -RT                                                                  | TTTGAAGGCGGCTTTACCGGCGAA                                    |
| 5249-F                                                                          | CGGACCAGGTGCGTGCTATC                                        |
| 5249-R                                                                          | GGTGAATGGATGGTTCGTCGTTGT                                    |
| <i>creB</i> -F                                                                  | ACTGTCCATGCGTCTCAATGC                                       |
| <i>creB</i> -R                                                                  | TTCCAGGCGGGATCAAGGT                                         |
| <i>gpmA</i> -F                                                                  | CGTTTATCACTGGCGGAGGAG                                       |
| <i>gpmA</i> -R                                                                  | ACCTTCGTTGCGTCATTTCCA                                       |
| <i>eno</i> -F                                                                   | CCGTGCCTCCGTTCTTC                                           |
| <i>eno</i> -R                                                                   | GACCGCATCCTGAACACCTT                                        |
| <i>uspA</i> -F                                                                  | CCGATGGTCTGCTGTTGCTTGA                                      |
| <i>uspA</i> -R                                                                  | GCGGGACTGACGGTCTTTGG                                        |
| <i>ppaC</i> -F                                                                  | CTGGTTGTGGCTGACTGGCTTA                                      |
| <i>ppaC</i> -R                                                                  | ACGGTGAGTAAATCGGGTTGTGAA                                    |
| 16S-F                                                                           | CCGCATAACGTCGCAAGA                                          |
| 16S-R                                                                           | AGTGTGGCTGGTCATCCT                                          |
| Gene deletion                                                                   |                                                             |
| CM-F                                                                            | CGACTCGAGAGCTTGATATCGAATTC                                  |
| CM-R                                                                            | TATACGCGTGATCCTCTAGAGCTTCGA                                 |
| sgRNA-R                                                                         | TCAAAAAAAGCACCGACTCGG                                       |
| <i>uspA</i> -SPF                                                                | TCCTAGGTATAATACTAGTCTTGTACAGAATGAAACCGAGTTTTAGAGCTAGAAATAGC |
| <i>uspA</i> -UF                                                                 | CGAGTCGGTGCTTTTTTTGAAGGCTGTGTTGCTGATGGGG                    |
| <i>uspA</i> -UR                                                                 | AAATCACCTCTTATAAGAAG                                        |
| <i>uspA</i> -DF                                                                 | CTTCTTATAAGAGGTGATTTAAGAAGGTCAAACCTTATGAG                   |
| <i>uspA</i> -DR                                                                 | CCAGTCGACGCGCCCTGCCAGCGGGCATGA                              |
| <i>creB</i> -SPF                                                                | TCCTAGGTATAATACTAGTCTTCCACCTGGTACCCTGGGTTTTAGAGCTAGAAATAGC  |
| <i>creB</i> -UF                                                                 | CGAGTCGGTGCTTTTTTTGACAAAGATGAAGCCACTCAAC                    |

|                                |                                                                         |
|--------------------------------|-------------------------------------------------------------------------|
| <i>crcB</i> -UR                | GGACAGTATCCAGCGGATCA                                                    |
| <i>crcB</i> -DF                | TGATCCGCTGGATACTGTCCAAGCATATGCGCCATACT                                  |
| <i>crcB</i> -DR                | CCAG <b>TCGAC</b> GATTGCAACCCGCGGATATG                                  |
| Is3G-SPF                       | TCCTAGGTATAATA <b>ACTAGTGATAATCCGATTTATGTCTT</b> GTGTTTTAGAGCTAGAAATAGC |
| Is3G-UF                        | CGAGTCGGTGCTTTTTTTGACATAAACCCCTCACTAATCCTGT                             |
| Is3G-UR                        | AGCTATACCTGACATACATGCC                                                  |
| Is3G-DF                        | GGCATGTATGTCAGGTATAGCTTCGCTGTCTCACACGCCGAATC                            |
| Is3G-DR                        | CCAG <b>TCGAC</b> CCGTGACCACCCTGCGCGACCGT                               |
| Is3G2-DF                       | GGCATGTATGTCAGGTATAGCTCTTCTGATGCGTCACCTCCTTG                            |
| Is3G2-DR                       | CCAG <b>TCGAC</b> CATACCGATGATAAATCCGCCA                                |
| Is3G1-SPF                      | TCCTAGGTATAATA <b>ACTAGTGGTTACCGGTGGACAAATCAGTTTT</b> AGAGCTAGAAATAGC   |
| Is3G1-UF                       | CGAGTCGGTGCTTTTTTTGAGGGAAGGGGTAGGGTGGTTC                                |
| Is3G1-UR                       | TATCAGCCAGAGCGAATGAAT                                                   |
| Is3G1-DF                       | ATTCATTCGCTCTGGCTGATATCGCTGTCTCACACGCCGAA                               |
| Is3G1-DR                       | CCAG <b>TCGACT</b> ACCGATGGGGTTTGTGGCG                                  |
| Verification of gene knockouts |                                                                         |
| <i>uspA</i> -yzF               | CGGCGGATAAACCTTTTTCCAGCA                                                |
| <i>uspA</i> -yzR               | TCGGCATCATTGACCATCATCGTAT                                               |
| <i>crcB</i> -yzF               | TCGCTCTGGCTGATAATGGAA                                                   |
| <i>ppaC</i> -yzR               | CCCGGGACTGTACTACCCTG                                                    |
| 5249-yzF                       | TATCTGCCGATGGATGTTCTG                                                   |
| Complementation                |                                                                         |
| 5249L                          | GCTA <b>AGCTTC</b> GAGTCCTGCCGTATCATCG                                  |
| 5252R                          | TGT <b>GAGCTC</b> CTTCTGATGCGTCACCTCCT                                  |
| 5257R                          | ATAG <b>AGCTC</b> CCCCGGGACTGTACTACCCTG                                 |
| 5253L                          | CGCA <b>AGCTTT</b> ATCAGCCAGAGCGAATGAA                                  |

<sup>a</sup> Restriction sites are indicated by bold characters. N<sub>20</sub> sequences are underlined.

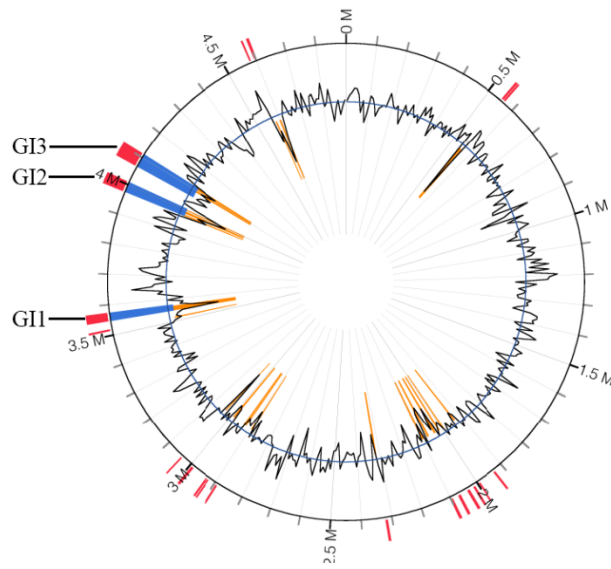

**Figure S1. Analysis of genomic islands from *E. cloacae* FRM.**

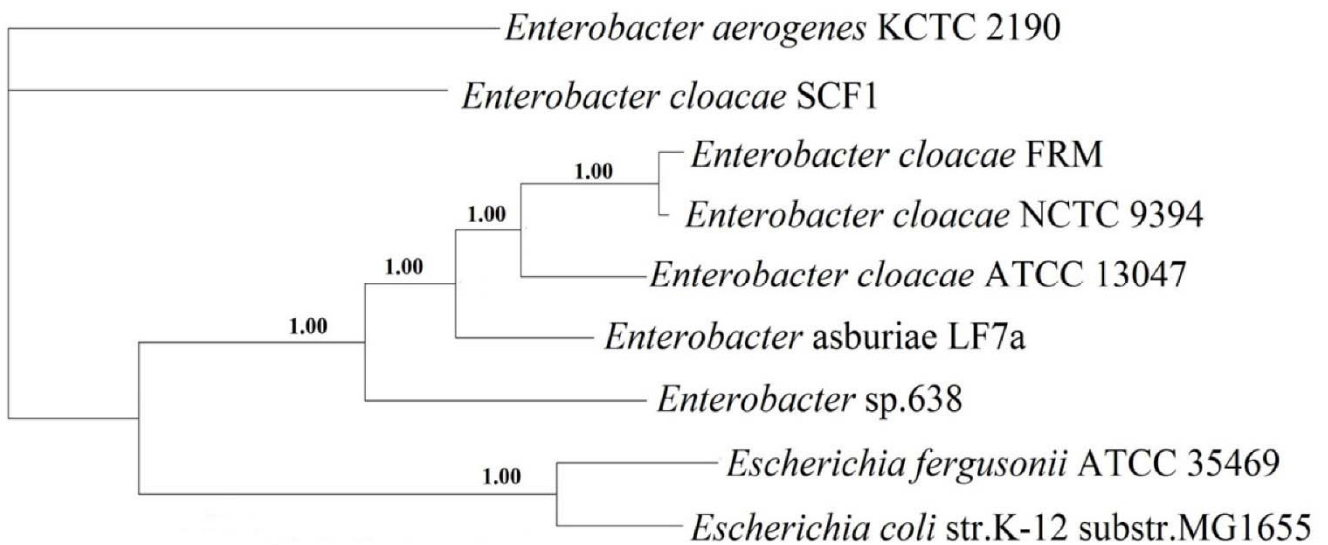

**Figure S2. Genome-based *Enterobacteriaceae* phylogeny. Phylogenetic tree of seven different *Enterobacteriaceae* and two *Escherichia* strains was constructed from the sequences of 527 orthologous genes of the nine genomes, identified by the reciprocal smallest distance algorithm.**

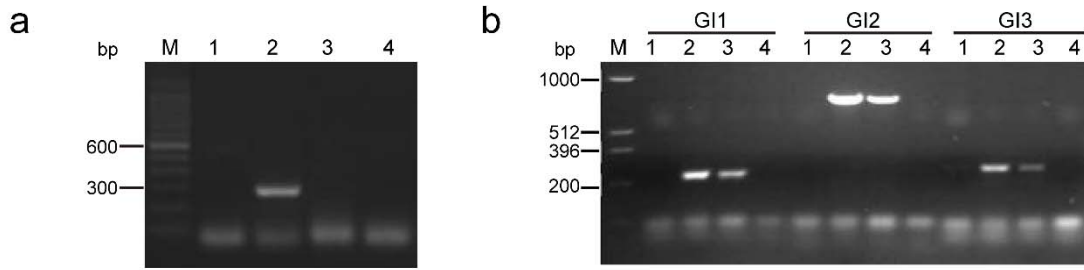

**Figure S3. Verification of the elimination of the three genomic islands and the plasmid p1.** (a) Identification of elimination of the plasmid p1 by PCR with the primers p1-F and p1-R. Lanes: M, 100-bp DNA ladder; templates: 1, ddH<sub>2</sub>O; 2, *E. cloacae* FRM genomic DNA; 3, *E. cloacae* FRM- $\Delta$ p1 $\Delta$ Is123 genomic DNA, and 4, *E. cloacae* FRM- $\Delta$ p1 genomic DNA. (b) Identification of elimination of the three genomic islands (GI1, GI2, and GI3) by PCR with the primers Is1-F and Is1-R, Is2-F and Is2-R, and Is3-F and Is3-R. Lanes: M, 1-kb DNA ladder; templates: 1, *E. cloacae* FRM- $\Delta$ p1 $\Delta$ Is123 genomic DNA; 2, *E. cloacae* FRM- $\Delta$ p1 genomic DNA; 3, *E. cloacae* FRM genomic DNA, and 4, ddH<sub>2</sub>O.

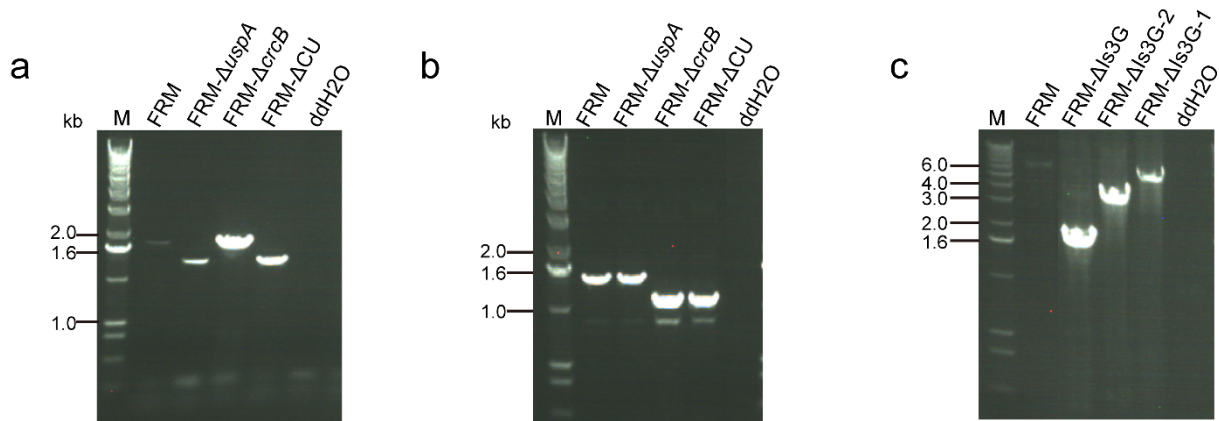

**Figure S4. Verification of gene knockouts by colony PCR with primers** (a) *uspA*-yzF and *uspA*-yzR located upstream and downstream of the *uspA* gene, (b) *crcB*-yzF and *crcB*-DR located upstream and downstream of the *crcB* gene, and (c) *ppaC*-yzR located upstream of the gene *ppaC* and 5249-yzF located downstream of orf5249.
